# Supplementary material
Source: PubMed Central journal article supplement (PMC3430477)
Supplement: Supp_Table1.pdf [file Supp_Table1.pdf]

SUPPLEMENTARY TABLE S1. MEAN FOLLOW-UP FIM MOTOR SCORE BY IMPORTANT BASELINE CHARACTERISTICS

| <i>Characteristic</i>                      | <i>Follow-up<br/>FIM<br/>motor score</i> | <i>p Value*</i> |
|--------------------------------------------|------------------------------------------|-----------------|
| Initial ASIA Impairment Scale              |                                          | < 0.01          |
| (AIS) grade:                               |                                          |                 |
| AIS grade A                                | 41.5                                     |                 |
| AIS grade B                                | 55.7                                     |                 |
| AIS grade C                                | 71.6                                     |                 |
| AIS grade D                                | 87.2                                     |                 |
| Level:                                     |                                          | < 0.01          |
| AMS ≤ 50                                   | 51.0                                     |                 |
| AMS > 50                                   | 87.7                                     |                 |
| MRI intramedullary signal characteristics: |                                          | < 0.01          |
| No signal change                           | 83.3                                     |                 |
| Consistent with edema                      | 71.8                                     |                 |
| Consistent with hemorrhage                 | 49.4                                     |                 |

\*Significance level for the difference in FIM motor score between the different levels of each predictor.

ASIA, American Spinal Injury Association; AMS, ASIA motor score; MRI, magnetic resonance imaging.
