# Supplementary material
Source: PubMed Central journal article supplement (PMC3430477)
Supplement: Supp_Table2.pdf [file Supp_Table2.pdf]

SUPPLEMENTARY TABLE S2. ASIA IMPAIRMENT SCALE (AIS) GRADE CONVERSIONS  
AND ASIA MOTOR SCORE (AMS) IMPROVEMENTS 6-MONTH FOLLOW-UP

| <i>Initial AIS grade</i> | <i>A</i> | <i>B</i> | <i>C</i> | <i>D</i> | <i>E</i> | <i>Total</i> | <i>AMS improvement</i> |
|--------------------------|----------|----------|----------|----------|----------|--------------|------------------------|
| A                        | 76       | 23       | 11       | 8        | 0        | 118          | 11.1                   |
| B                        | 5        | 13       | 13       | 18       | 1        | 50           | 34.5                   |
| C                        | 0        | 2        | 8        | 38       | 5        | 53           | 40.1                   |
| D                        | 0        | 0        | 1        | 68       | 35       | 104          | 17.3                   |

ASIA, American Spinal Injury Association.
